# Supplementary material for: New emerging targets in cancer immunotherapy: the role of Cluster of Differentiation 40 (CD40/TNFR5)
Source: PubMed Central journal article supplement — ESMO Open. 2019 Jun 12;4(Suppl 3):e000510. doi: 10.1136/esmoopen-2019-000510 (PMC6579575; doi:10.1136/esmoopen-2019-000510), 2019-06-12
Supplement: esmoopen-2019-000510supp001.pdf [file esmoopen-2019-000510supp001.pdf]

Supplementary Table 1: List of completed and ongoing clinical trials using agonistic CD40 antibodies

| Database identifier         | Tumor type                | Setting                                                                | Phase | Treatment arms                                                                                                                                     | Target accrual | Status    | Reference |
|-----------------------------|---------------------------|------------------------------------------------------------------------|-------|----------------------------------------------------------------------------------------------------------------------------------------------------|----------------|-----------|-----------|
| NCT02225002                 | solid tumors              | advanced disease                                                       | I     | CP-870,893 (single dose)                                                                                                                           | 29             | completed | 38        |
| NCT02157831                 | solid tumors              | advanced disease                                                       | I     | CP-870,893 (weekly dose)                                                                                                                           | 27             | completed | 39        |
| NCT00607048                 | solid tumors              | 1 <sup>st</sup> line, advanced disease                                 | I     | CP-870,893 + carboplatin/paclitaxel                                                                                                                | 34             | completed | 40        |
| ACTRN12609000294257         | pleural mesothelioma      | 1 <sup>st</sup> line, advanced disease                                 | I     | CP-870,893 + cisplatin/premetexed                                                                                                                  | 15             | completed | 42        |
| NCT00711191                 | pancreatic adenocarcinoma | 1 <sup>st</sup> line, chemotherapy-naïve, surgically uncurable disease | I     | CP-870,893 + gemcitabine                                                                                                                           | 22             | completed | 25,41     |
| NCT01456585/<br>NCT02588443 | pancreatic adenocarcinoma | 1 <sup>st</sup> line, resectable tumors                                | I     | 1. neoadjuvant CP-870,893<br>2. neoadjuvant CP-870,893 + gemcitabine/nab-paclitaxel<br>both arms: adjuvant CP-870,893 + gemcitabine/nab-paclitaxel | 10             | completed |           |
| NCT01103635                 | melanoma                  | metastatic disease                                                     | I     | CP-870,893 + tremelimumab (anti-CTLA- 4)                                                                                                           | 32             | completed | 43        |
| NCT01008527                 | melanoma                  | stage III or IV                                                        | I     | CP-870,893 + peptid vaccine + poly IC:LC                                                                                                           | 22             | completed |           |

|             |                                                                                                                                                                                         |                                                                                        |   |                                                                                                      |     |                       |    |
|-------------|-----------------------------------------------------------------------------------------------------------------------------------------------------------------------------------------|----------------------------------------------------------------------------------------|---|------------------------------------------------------------------------------------------------------|-----|-----------------------|----|
| NCT02760797 | solid tumors                                                                                                                                                                            | advanced disease, with no other effective therapy option available                     | I | RO7009789 + emactuzumab (anti-CSF1R)                                                                 | 38  | recruitment completed |    |
| NCT02304393 | solid tumors                                                                                                                                                                            | locally advanced/ metastatic disease, with no other effective therapy option available | I | 1. selicrelumab i.v. + atezolizumab (anti-PD-L1)<br>2. selicrelumab s.c. + atezolizumab (anti-PD-L1) | 230 | active                |    |
| NCT02665416 | solid tumors                                                                                                                                                                            | metastatic disease, with no other effective therapy option available                   | I | 1. selicrelumab + vanucizumab (anti-Ang2)<br>2. selicrelumab + bevacizumab (anti-VEGF)               | 170 | active                |    |
| NCT01561911 | CD40-expressing solid tumors and lymphoma                                                                                                                                               | advanced disease, with no other effective therapy option available                     | I | ChiLob 7/4 (weekly dose)                                                                             | 29  | completed             | 52 |
| NCT02482168 | 1. solid tumors<br>2./3. urothelial carcinoma, melanoma, squamous cell carcinoma of the head and neck, NSCLC, or any solid tumor with high microsatellite instability status (MSI-high) | patients with no other effective therapy option available                              | I | 1. APX005M (every 3 weeks)<br>2. APX005M (every 2 weeks)<br>3. APX005M (every 1 week)                | 43  | recruitment completed |    |

|             |                                                                                                 |                                                                                                                                                                                                   |      |                                                                                                    |     |            |  |
|-------------|-------------------------------------------------------------------------------------------------|---------------------------------------------------------------------------------------------------------------------------------------------------------------------------------------------------|------|----------------------------------------------------------------------------------------------------|-----|------------|--|
| NCT03389802 | 1. primary malignant pediatric CNS tumors ex diffuse intrinsic pontine glioma (DIPG)<br>2. DIPG | 1. recurrent or refractory disease<br>2. newly diagnosed                                                                                                                                          | I    | APX005M (every 3 weeks)                                                                            | 45  | recruiting |  |
| NCT03214250 | pancreatic adenocarcinoma                                                                       | untreated metastatic disease                                                                                                                                                                      | I/II | 1. APX005M + gemcitabine + nab-paclitaxel<br>2. APX005M + gemcitabine + nab-paclitaxel + nivolumab | 105 | recruiting |  |
| NCT03719430 | soft tissue sarcoma                                                                             | uncurable disease                                                                                                                                                                                 | II   | APX005M + doxorubicin + olaratumab (anti-PDGFR $\alpha$ )                                          | 27  | recruiting |  |
| NCT03165994 | esophageal carcinoma, gastroesophageal carcinoma                                                | resectable, previously untreated disease                                                                                                                                                          | II   | Neoadjuvant APX005M + radiation therapy + carboplatin + paclitaxel                                 | 16  | recruiting |  |
| NCT03123783 | 1. NSCLC<br>2. melanoma                                                                         | 1. immunotherapy naïve advanced or metastatic disease, which progressed under chemotherapy/ targeted therapy<br>2. unresectable or metastatic disease which progressed under PD-1/PDL-1 treatment | I/II | APX005M + nivolumab (anti-PD1)                                                                     | 100 | recruiting |  |

|             |                                           |                                                                |      |                                                                                                                                                                                                                                                                                                                                                                                                                                                   |     |            |    |
|-------------|-------------------------------------------|----------------------------------------------------------------|------|---------------------------------------------------------------------------------------------------------------------------------------------------------------------------------------------------------------------------------------------------------------------------------------------------------------------------------------------------------------------------------------------------------------------------------------------------|-----|------------|----|
| NCT02706353 | melanoma                                  | metastatic disease                                             | I/II | APX005M (injected intratumorally) + pembrolizumab (anti-PD1)                                                                                                                                                                                                                                                                                                                                                                                      | 41  | recruiting |    |
| NCT03597282 | melanoma                                  | advanced or metastatic, previously untreated disease           | I    | <ol style="list-style-type: none"> <li>1. APX005M + NEO-PV-01 + poly IC:LC + nivolumab</li> <li>2. APX005M + NEO-PV-01 + poly IC:LC</li> <li>3. APX005M + nivolumab</li> <li>4. NEO-PV-01 + poly IC:LC + nivolumab</li> <li>5. NEO-PV-01 + poly IC:LC + nivolumab (alternate schedule)</li> <li>6. nivolumab + poly IC:LC</li> <li>7. NEO-PV-01 + poly IC:LC + nivolumab + ipilimumab (anti-CTLA-4)</li> <li>8. nivolumab + ipilimumab</li> </ol> | 40  | recruiting |    |
| NCT03502330 | NSCLC<br>melanoma<br>renal cell carcinoma | uncurable disease, which progressed under PD-1/PD-L1 treatment | I    | <ol style="list-style-type: none"> <li>1. APX005M + cabiralizumab (anti-CSF1R)</li> <li>2. APX005M + cabiralizumab + nivolumab</li> </ol>                                                                                                                                                                                                                                                                                                         | 120 | recruiting |    |
| NCT02379741 | solid tumors                              | advanced disease                                               | I    | <ol style="list-style-type: none"> <li>1. ADC-1013 i.v.</li> <li>2. ADC-1013 (injected intratumorally)</li> </ol>                                                                                                                                                                                                                                                                                                                                 | 24  | completed  | 49 |

|             |                                                        |                                                                |   |                                                                                                   |     |            |  |
|-------------|--------------------------------------------------------|----------------------------------------------------------------|---|---------------------------------------------------------------------------------------------------|-----|------------|--|
| NCT02829099 | solid tumors                                           | advanced disease                                               | I | JNJ-64457107                                                                                      | 114 | recruiting |  |
| NCT02376699 | malignancies including 1. solid tumors and 2. lymphoma | advanced disease                                               | I | 1. SEA-CD40 i.v.<br>2. SEA-CD40 i.v. + pembrolizumab (only for solid tumors)<br>3. SEA-CD40 s.c.  | 95  | recruiting |  |
| NCT03329950 | solid tumors                                           | advanced disease, which failed all standard of care treatments | I | 1. CDX-1140<br>2. CDX-1140 + CDX340 (recombinant human FMS-like tyrosine kinase-3 ligand (Flt3L)) | 140 | recruiting |  |
| NCT02955251 | solid tumors, NSCLC                                    | advanced disease                                               | I | 1. ABBV-428<br>2. ABBV-428 + nivolumab                                                            | 172 | recruiting |  |
